# Supplementary material
Source: Springer Nature journal article supplement (https://www.springermedizin.de/resource/supplementary/13052_2013_330_MOESM2_ESM.pdf/9671876)

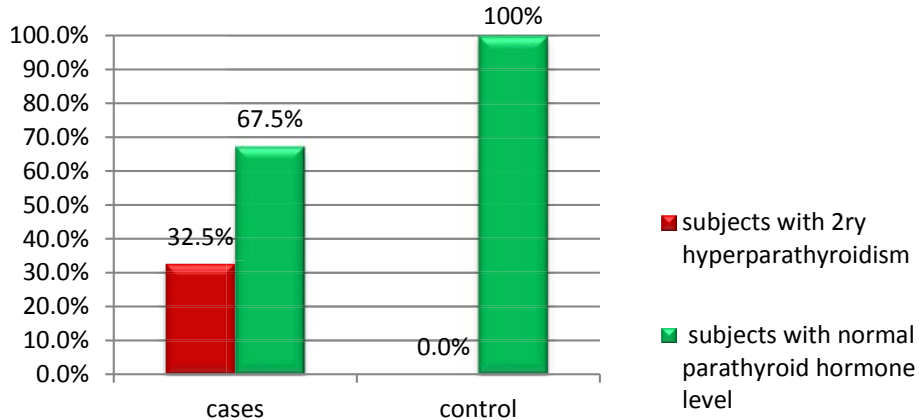

**parathyroid hormone status among studied subjects**

**( $p < 0.01$ )**

Supplement: MOESM2 [file 9671876]
